# Supplementary material
Source: ML conference proceedings conference paper supplement (https://openreview.net/forum?id=NiM9Q7Z95z)
Supplement: supplementary_material [file attachment]

## A SecureNN Models

```
tf.keras.layers.Flatten(),
tf.keras.layers.Dense(128, activation='relu'),
tf.keras.layers.Dense(128, activation='relu'),
tf.keras.layers.Dense(10, activation='softmax')
```

Figure 1: Network A used by Mohassel and Zhang [2017]

```
tf.keras.layers.Conv2D(16, 5, 1, 'same', activation='relu'),
tf.keras.layers.MaxPooling2D(2),
tf.keras.layers.Conv2D(16, 5, 1, 'same', activation='relu'),
tf.keras.layers.MaxPooling2D(2),
tf.keras.layers.Flatten(),
tf.keras.layers.Dense(100, activation='relu'),
tf.keras.layers.Dense(10, activation='softmax')
```

Figure 2: Network B used by Liu et al. [2017]

```
tf.keras.layers.Conv2D(20, 5, 1, 'valid', activation='relu'),
tf.keras.layers.MaxPooling2D(2),
tf.keras.layers.Conv2D(50, 5, 1, 'valid', activation='relu'),
tf.keras.layers.MaxPooling2D(2),
tf.keras.layers.Flatten(),
tf.keras.layers.Dense(100, activation='relu'),
tf.keras.layers.Dense(10, activation='softmax')
```

Figure 3: Network C used by LeCun et al. [1998]

```
tf.keras.layers.Conv2D(5, 5, 2, 'same', activation='relu'),
tf.keras.layers.Flatten(),
tf.keras.layers.Dense(100, activation='relu'),
tf.keras.layers.Dense(10, activation='softmax')
```

Figure 4: Network D used by Riazi et al. [2018]

## B Communication

Table 1 shows the communication of our implementation in comparison to previous works. As Tan et al. [2021], we note that the implementation of Wagh et al. [2021] does not compute an appropriate gradient in the back-propagation, which limits the comparison.

## C Fashion MNIST

We have run our implementation on Fashion MNIST for a more complete picture. Figure 5 shows our results.

Table 1: Comparison to previous work. Accuracy N/A means that the accuracy figures were not given or computed in a way that does not reflect the secure computation.

| Network |                    | Comm. per epoch (GB) | Acc. (# epochs) | Precision ( $f$ ) |
|---------|--------------------|----------------------|-----------------|-------------------|
| A       | Wagh et al. [2021] | 3                    | N/A             | 13                |
|         | Ours               | 26                   | 97.9% (15)      | 16                |
|         | Ours               | 55                   | 97.7% (15)      | 32                |
| B       | Wagh et al. [2021] | 108                  | N/A             | 13                |
|         | Ours               | 20                   | 93.6% (15)      | 16                |
|         | Ours               | 41                   | 94.7% (15)      | 32                |
| C       | Wagh et al. [2021] | 162                  | N/A             | 13                |
|         | Tan et al. [2021]  | 534                  | 94.0% (5)       | 20                |
|         | Ours               | 352                  | 94.9% (5)       | 16                |
|         | Ours               | 711                  | 93.8% (5)       | 32                |
| D       | Wagh et al. [2021] | 11                   | N/A             | 13                |
|         | Ours               | 41                   | 96.8% (15)      | 16                |
|         | Ours               | 86                   | 96.8% (15)      | 32                |

## D Hyperparameter Settings

In the following we discuss our choice of hyperparameters.

**Number of epochs** As we found convergence after 100 epochs, we have run most of our benchmarks for 150 epochs, except for the comparison of optimizers where we stopped at 100.

**Early stop** We have not used early stop.

**Mini-batch size** We have used 128 throughout as it is a standard size. We briefly trialed 1024 as suggested by Li et al. [2017], but did not found any improvement.

**Learning rate** We have tried a number of learning rates as documented in the main paper. As a result, we settled for 0.01 for SGD in further benchmarks.

**Learning rate decay/schedule** We have not used either.

**Random initialization** The platform uses independent random initialization by design.

**Dropout** We have experimented with Dropout but not found any improvement.

**Input preprocessing** We have normalized the inputs to  $[0, 1]$ .

**Test/training split** We have used the usual MNIST split.

## E Update Normalization

Agrawal et al. [2019] have suggested to normalize update gradients with AMSgrad (line 7 in Algorithm 4). However, Figure 6 shows that this does not improve the performance compared to SGD.

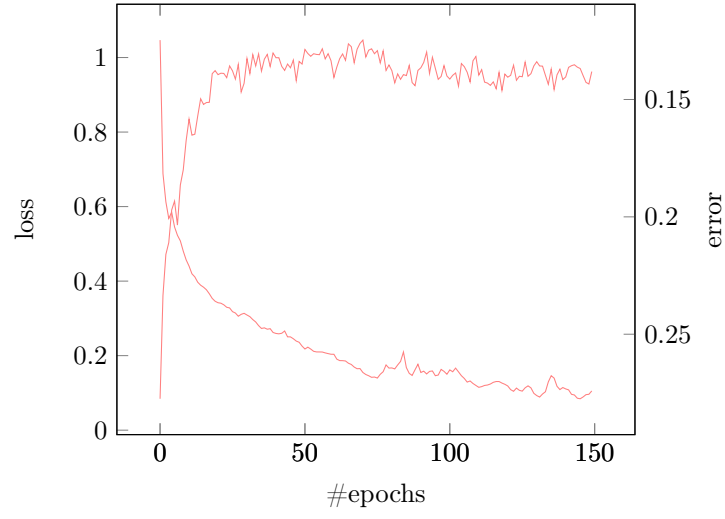

Figure 5: Network C with Fashion MNIST when running SGD with rate 0.01.

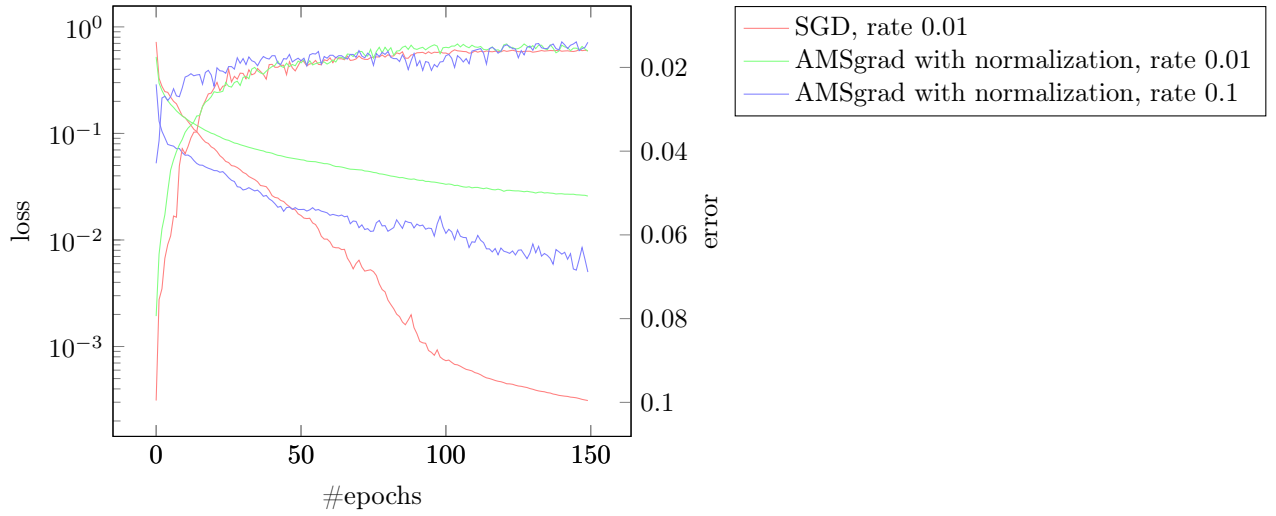

Figure 6: Loss and accuracy for network C,  $f = 32$ , and probabilistic truncation.

## References

- N. Agrawal, A. S. Shamsabadi, M. J. Kusner, and A. Gascón. QUOTIENT: Two-party secure neural network training and prediction. In L. Cavallaro, J. Kinder, X. Wang, and J. Katz, editors, *ACM CCS 2019*, pages 1231–1247. ACM Press, Nov. 2019. doi: 10.1145/3319535.3339819.
- Y. LeCun, L. Bottou, Y. Bengio, and P. Haffner. Gradient-based learning applied to document recognition. *Proceedings of the IEEE*, 86(11):2278–2324, 1998.
- H. Li, S. De, Z. Xu, C. Studer, H. Samet, and T. Goldstein. Training quantized nets: A deeper understanding. In I. Guyon, U. V. Luxburg, S. Bengio, H. Wallach, R. Fergus, S. Vishwanathan, and R. Garnett, editors, *Advances in Neural Information Processing Systems*, volume 30. Curran Associates, Inc., 2017. URL <https://proceedings.neurips.cc/paper/2017/file/1c303b0eed3133200cf715285011b4e4-Paper.pdf>.
- J. Liu, M. Juuti, Y. Lu, and N. Asokan. Oblivious neural network predictions via MiniONN transformations. In B. M. Thuraisingham, D. Evans, T. Malkin, and D. Xu, editors, *ACM CCS 2017*, pages 619–631. ACM Press, Oct. / Nov. 2017. doi: 10.1145/3133956.3134056.
- P. Mohassel and Y. Zhang. SecureML: A system for scalable privacy-preserving machine learning. In *2017 IEEE Symposium on Security and Privacy*, pages 19–38. IEEE Computer Society Press, May 2017. doi: 10.1109/SP.2017.12.
- M. S. Riazi, C. Weinert, O. Tkachenko, E. M. Songhori, T. Schneider, and F. Koushanfar. Chameleon: A hybrid secure computation framework for machine learning applications. In J. Kim, G.-J. Ahn, S. Kim, Y. Kim, J. López, and T. Kim, editors, *ASIACCS 18*, pages 707–721. ACM Press, Apr. 2018.
- S. Tan, B. Knott, Y. Tian, and D. J. Wu. CryptGPU: Fast privacy-preserving machine learning on the GPU, 2021.
- S. Wagh, S. Tople, F. Benhamouda, E. Kushilevitz, P. Mittal, and T. Rabin. Falcon: Honest-majority maliciously secure framework for private deep learning. *PoPETs*, 2021(1):188–208, Jan. 2021. doi: 10.2478/popets-2021-0011.
